# Supplementary material for: Tagraxofusp, a first-in-class CD123-targeted anticancer agent: A pharmacovigilance study based on the FAERS database
Source: Research Square preprint supplement (doi:10.21203/rs.3.rs-7678895/v1), 2025-10-06
Supplement: Supplementary file 1 [file 08c8450cc6d72c6cdab04f43.docx]

| **Supplementary Table 1** Four-fold table of disproportionality analysis | | | |
| --- | --- | --- | --- |
| **Item** | **Number of target AEs** | **Number of other AEs** | **Total** |
| Target drug | a | b | a + b |
| Other drugs | c | d | c + d |
| Total | a + c | b + d | N = a + b + c + d |

| **Supplementary Table 2**  Summary of major algorithms used for signal detection | | | |
| --- | --- | --- | --- |
| **Algorithms** | **Indicator** | **Equation** | **Criteria** |
| ROR | ROR | ROR = ad/c/b | ROR05 > 1, N ≥ 2 |
|  |  | 95CI = eln(ROR)±1.96(1/a+1/b+1/c+1/d)^0.5 |  |
| PRR | PRR | PRR = [a/(a+b)]/[c/(c + d)] | PRR≥2 |
|  | χ2 | χ2 = [(ad-bc)2 (a+b + c + d)]/[(a+b)(c + d)(a+c)(b + d)] | χ2 ≥ 4, N ≥ 3 |
| BCPNN | IC | IC = log2 [a (a+b + c + d)]/[(a+c)(a+b)] | IC025 > 0 |
|  |  | 95CI = eln(IC)±1.96(1/a+1/b+1/c+1/d)^0.5 |  |
| MGPS | EBGM | EBGM = a (a+b + c + d)/(a+c)/(a+b) | EBGM05 > 2, N ≥ 0 |
|  |  | 95CI = eln(EBGM)±1.96(1/a+1/b+1/c+1/d)^0.5 |  |


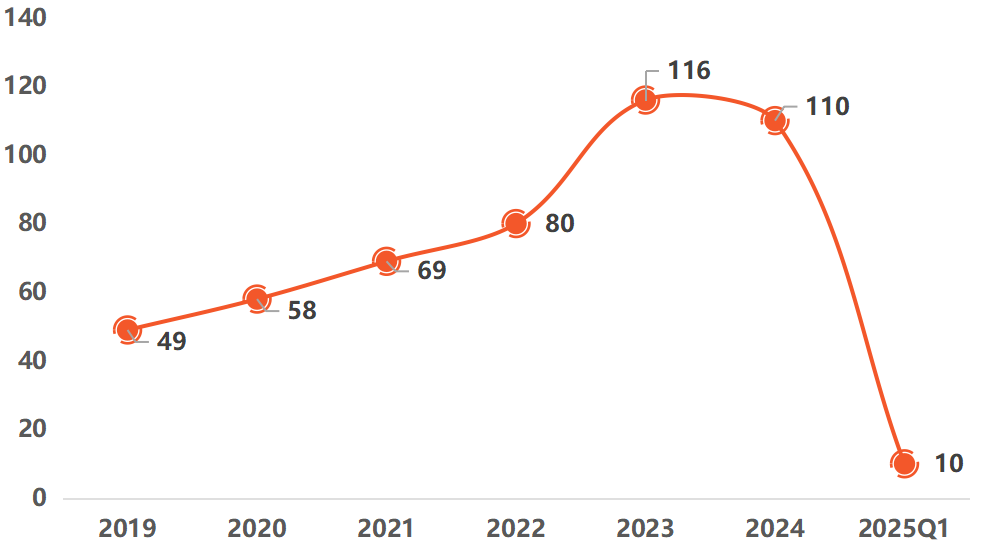


**Supplementary Figure 1** Number of reported AEs of tagraxofusp from 2019 to 2025Q1
